# Supplementary material for: The surface-enhanced Raman scattering of all-inorganic perovskite quantum dots of CsPbBr3encapsulated in a ZIF-8 metal–organic framework
Source: Royal Society of Chemistry journal article supplement (doi:10.1039/d0nj03587d), 2020-01-01
Supplement: d0nj03587d1.pdf [file d0nj03587d1.pdf]

Supporting Information

**Surface-enhancement Raman scattering of all inorganic perovskite quantum dots CsPbBr<sub>3</sub> encapsulated in Metal-organic framework ZIF-8**

Mingyang Xin <sup>a</sup>, Yuzhou Fu <sup>a</sup>, Yue Zhou <sup>a</sup>, Junhe Han<sup>a</sup>, Yanli Mao<sup>a</sup>, Mengjia Li <sup>b</sup>,  
Junhui Liu <sup>\*a</sup>, Mingju Huang <sup>\*a</sup>

<sup>a</sup>Key Laboratory of International Joint Research Laboratory of New Energy

Materials and Devices of Henan Province, School of Physics and Electronics, Henan

University, Kaifeng 475004, China

<sup>b</sup>School of Materials Science and Engineering, Zhengzhou University,

Zhengzhou, 450001, China

\* Corresponding author.

E-mail addresses: [liujh@henu.edu.cn](mailto:liujh@henu.edu.cn) (Junhui Liu), [hmingju@163.com](mailto:hmingju@163.com) (Mingju Huang).

**Materials**

Silver nitrate (AgNO<sub>3</sub>, AR, 99.8%), polyvinylpyrrolidone (PVP, K30), sodium citrate (AR, 99.0%), Lead (II) bromide (PbBr<sub>2</sub>, 99.999%), cesium bromide (CsBr, 99.999%), 6-Mercaptopurine (6-MP), N, N-Dimethylformamide (DMF), 4-Mercaptopyridine (4-MPY), Methanol, Ethanol, Cyclohexane and zinc nitrate hexahydrate (Zn(NO<sub>3</sub>)<sub>2</sub>·6H<sub>2</sub>O, 99.999%) were obtained from Aladdin Industrial Corporation. 2-Methylimidazole (2-MIM) was purchased from Spectrochem. Toluene is redistilled prior to use and other solvents are treated with 4A molecular sieves.

### Preparation of calcium titanium composite assembled substrates.

Clean 0.5cm x 1cm silicon with an ultrasonic cleaner using deionized water, ethanol, acetone, chloroform, acetone, ethanol, and deionized water in turn. Rinse off residual organic solvents with deionized water. Boiling by immersing wafers in a mixture of 30% H<sub>2</sub>O<sub>2</sub> and 98% H<sub>2</sub>SO<sub>4</sub> with a volume ratio of 3:7 solution. After cooling, rinse the wafer repeatedly with deionized water. Eventually, the wafer surface is covered with hydroxyl groups.

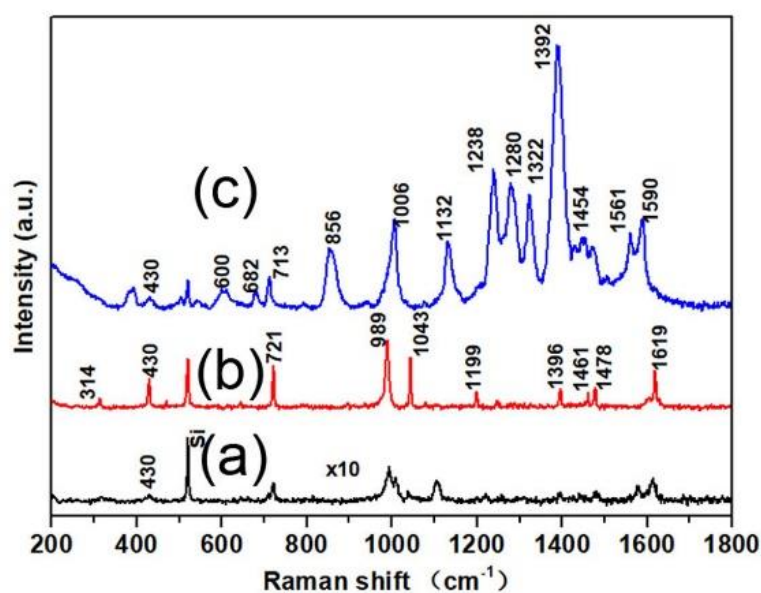

**Fig.S1** (a) Raman diagram of 6-MP. (b) SERS diagram of 6-MP adsorbed on the composites surface. (c) SERS diagram of 6-MP adsorbed on an Ag surface.

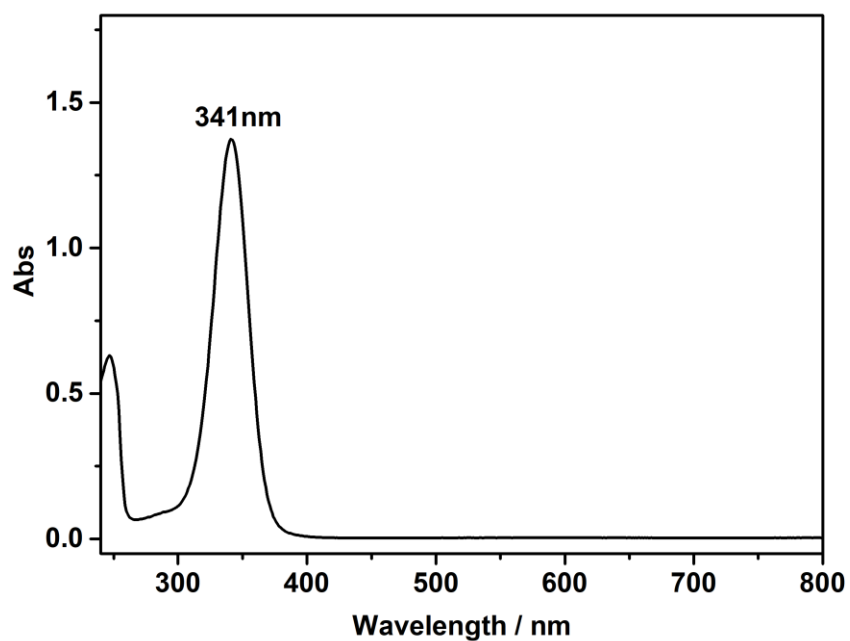

Fig. S2 UV-Vis spectra of 4-MPY.

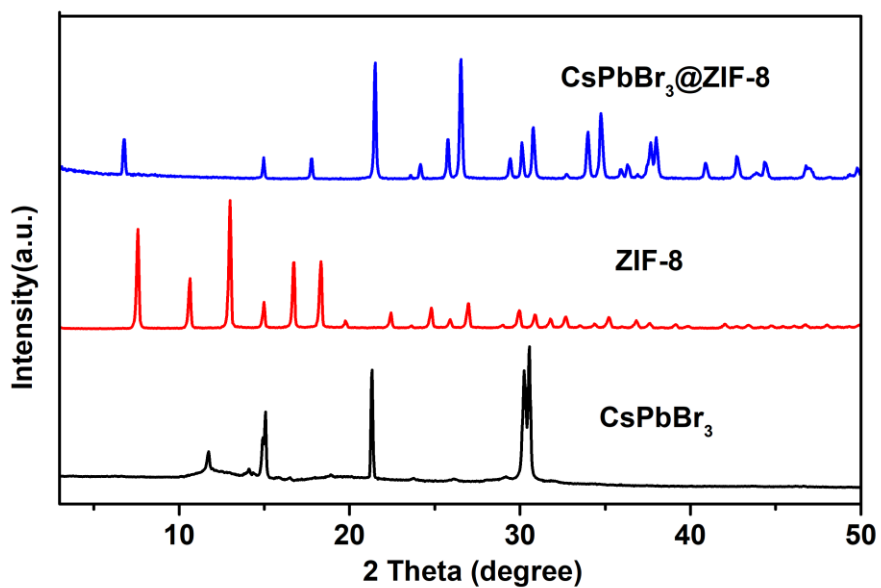

Fig. S3 Comparison of PXRD patterns of CsPbBr<sub>3</sub>, ZIF-8, CsPbBr<sub>3</sub>@ZIF-8.

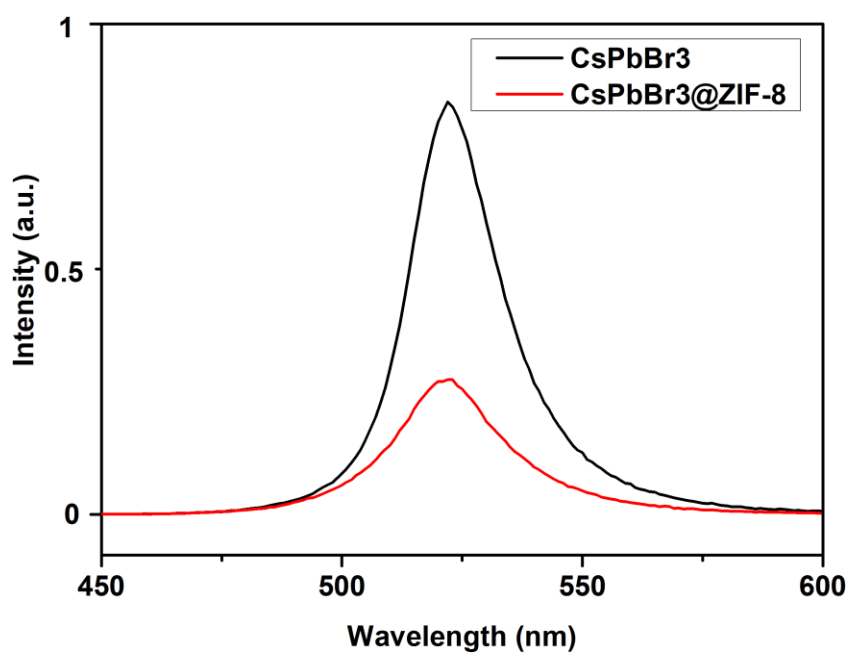

Fig. S4 Steady-state PL spectra.

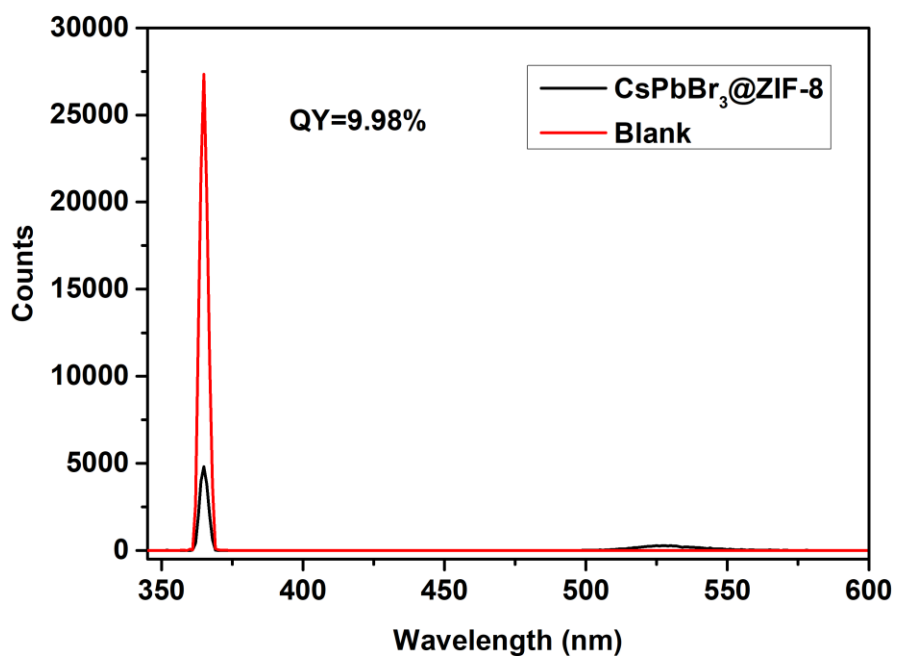

Fig. S5 PLQY of CsPbBr<sub>3</sub>@ZIF-8.

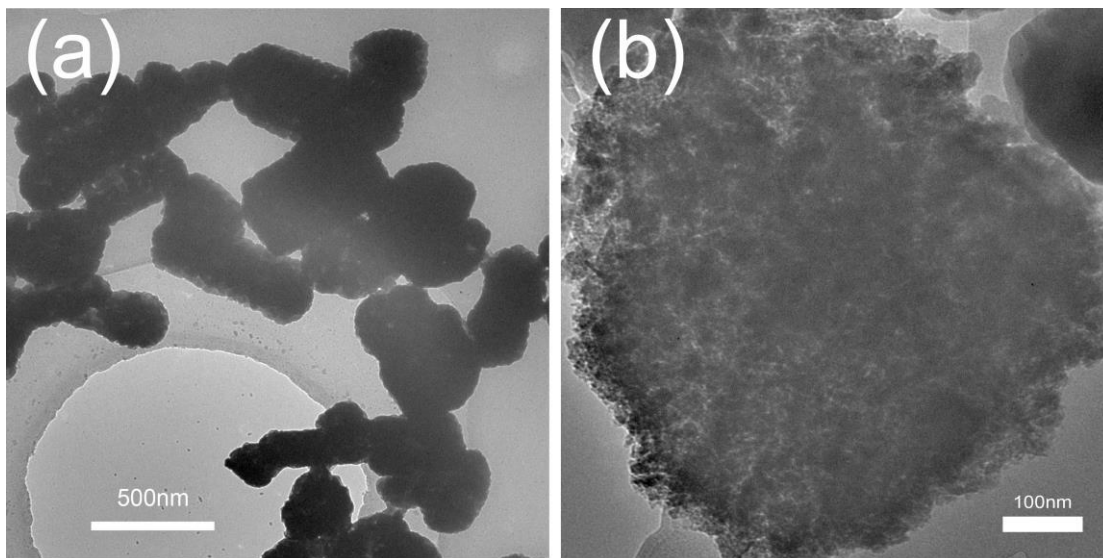

**Fig. S6** TEM pictures of composite material CsPbBr<sub>3</sub>@ZIF-8.

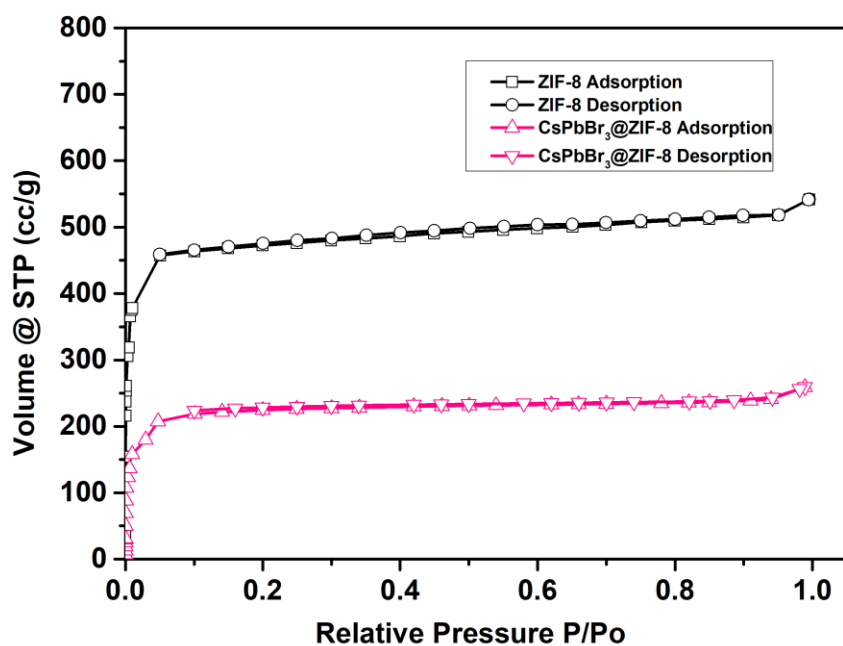

**Fig. S7** N<sub>2</sub> gas adsorption at 77 K for ZIF-8 and CsPbBr<sub>3</sub>@ZIF-8 composite. The gas uptake amount for composite is relatively low due to formation of CsPbBr<sub>3</sub> NCs inside ZIF-8 cavity.

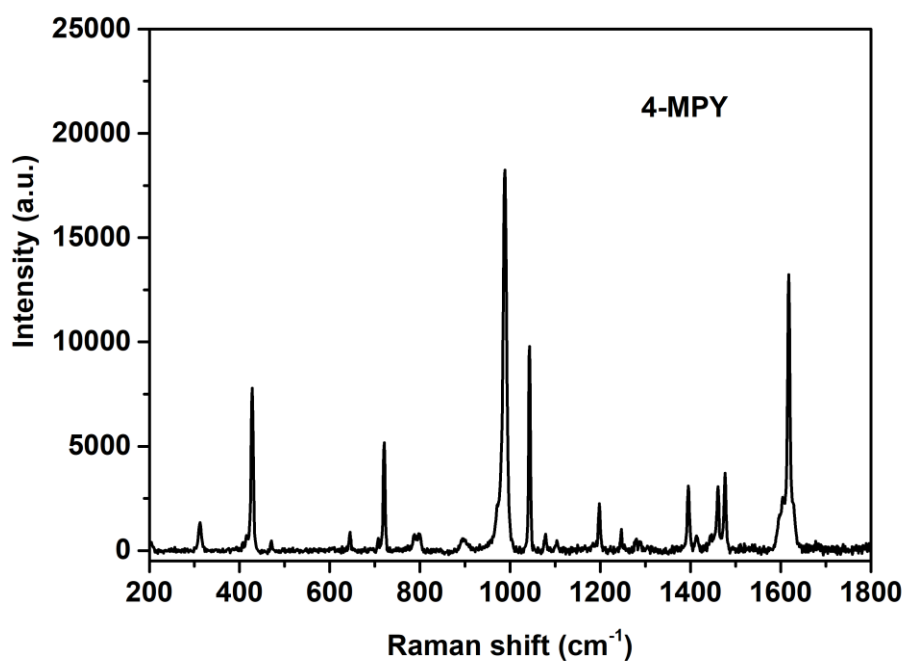

Fig. S8 Normal Raman spectrum of 4-MPY (0.3M).

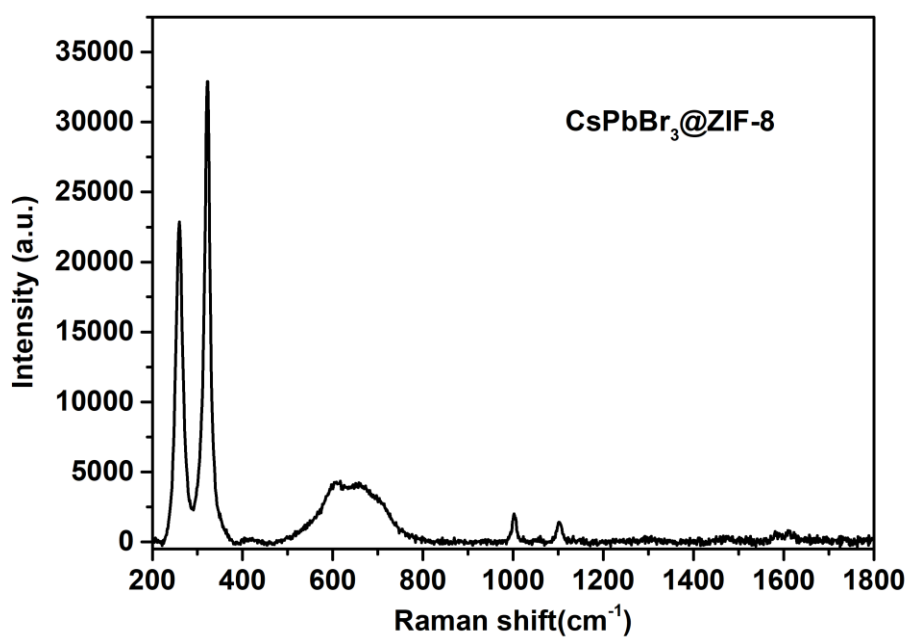

Fig. S9 Normal Raman spectrum of CsPbBr<sub>3</sub>@ZIF-8.

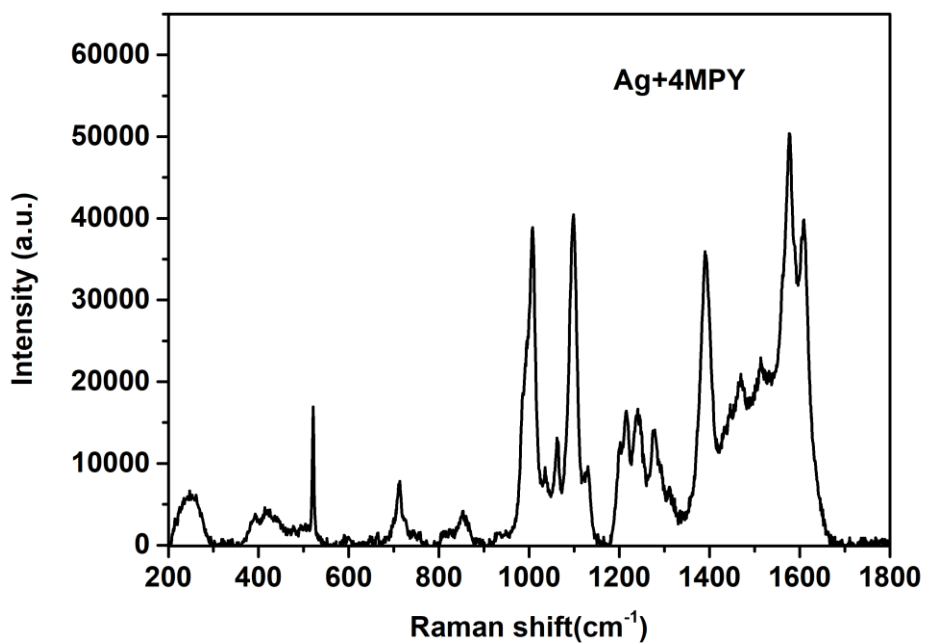

Fig. S10 SERS spectra of 4-MPY adsorbed on Ag film.

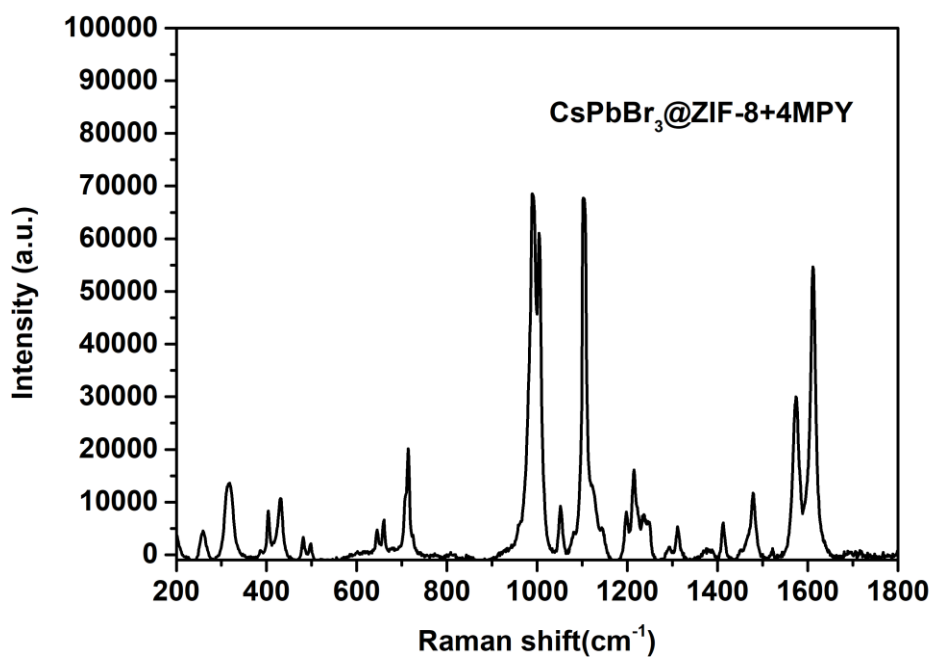

Fig. S11 SERS spectra of 4-MPY adsorbed on CsPbBr<sub>3</sub>@ZIF-8.

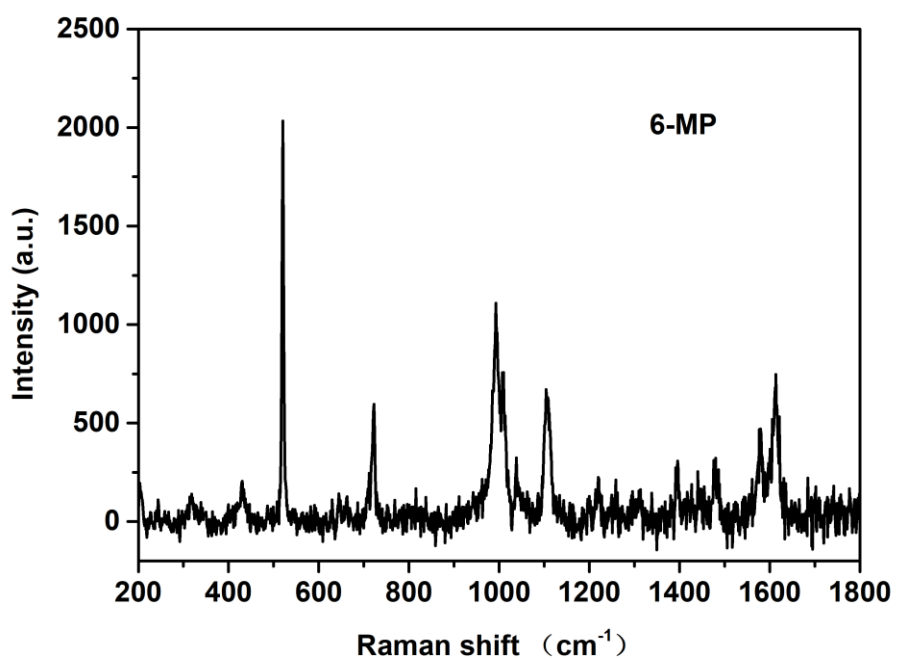

Fig. S12 Raman diagram of 6-MP (0.3M).

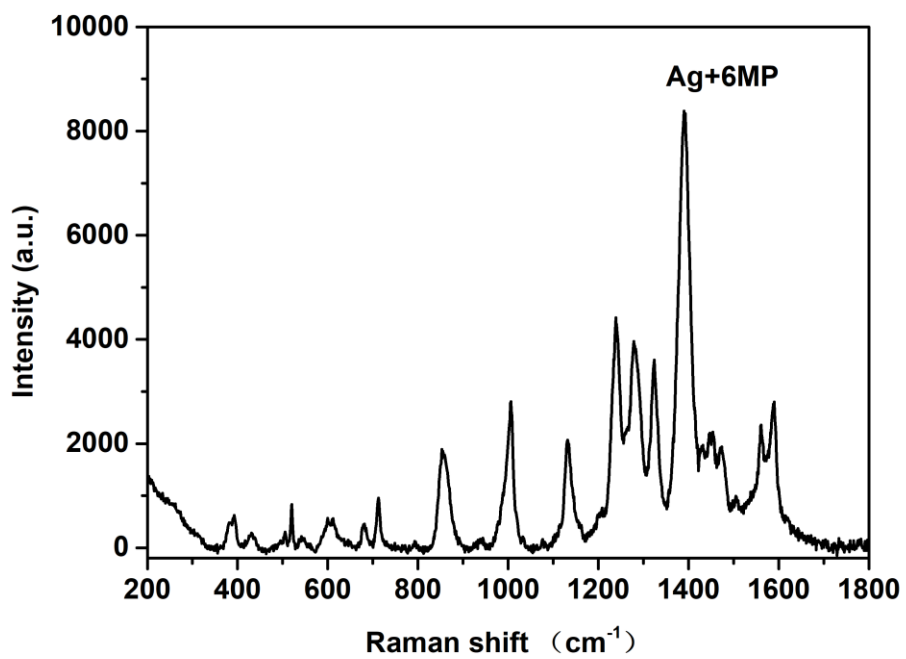

Fig. S13 SERS diagram of 6-MP adsorbed on an Ag surface.



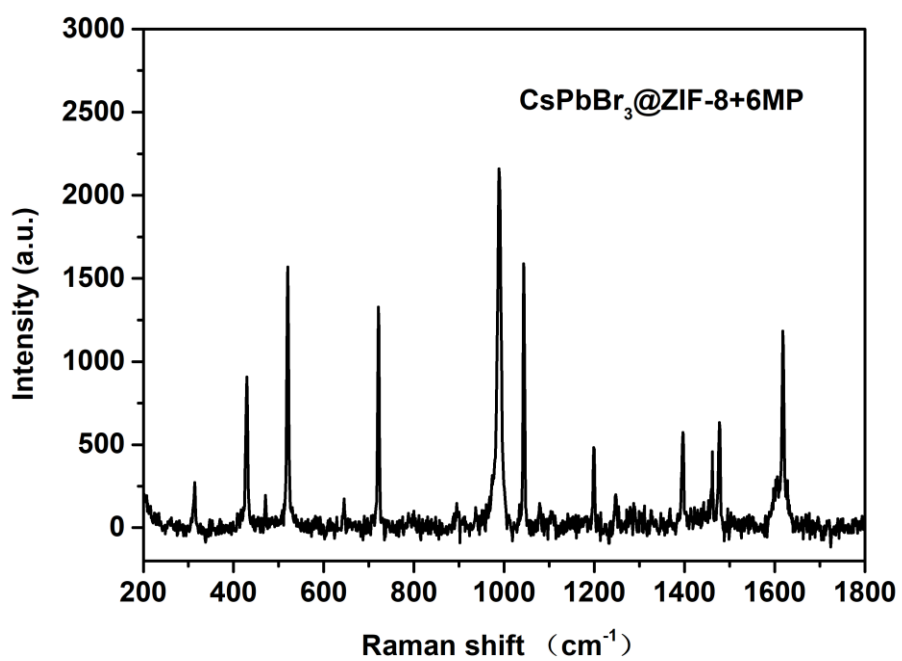

Fig. S14 SERS diagram of 6-MP adsorbed on the composites surface.

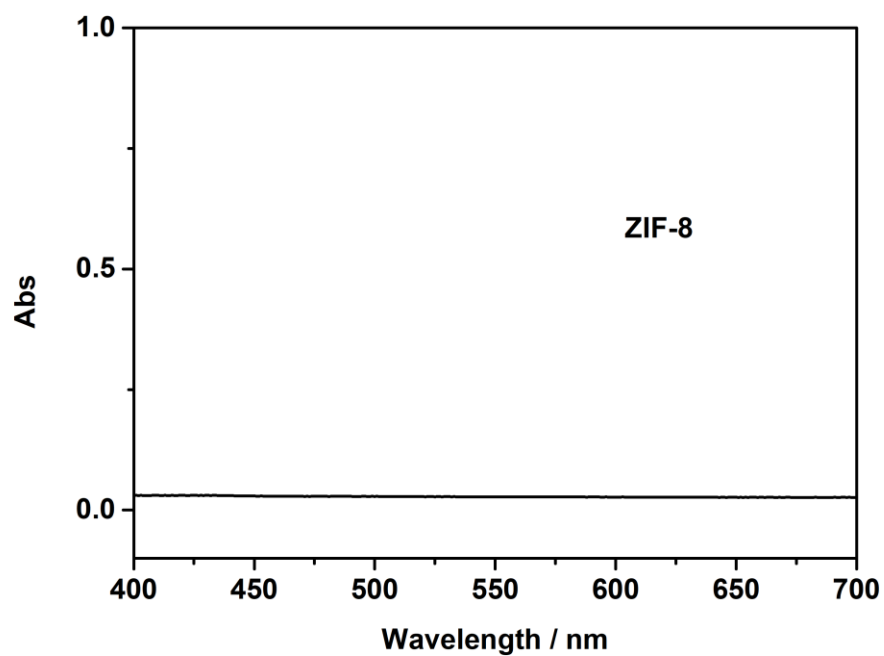

Fig. S15 UV-Vis spectra of ZIF-8.

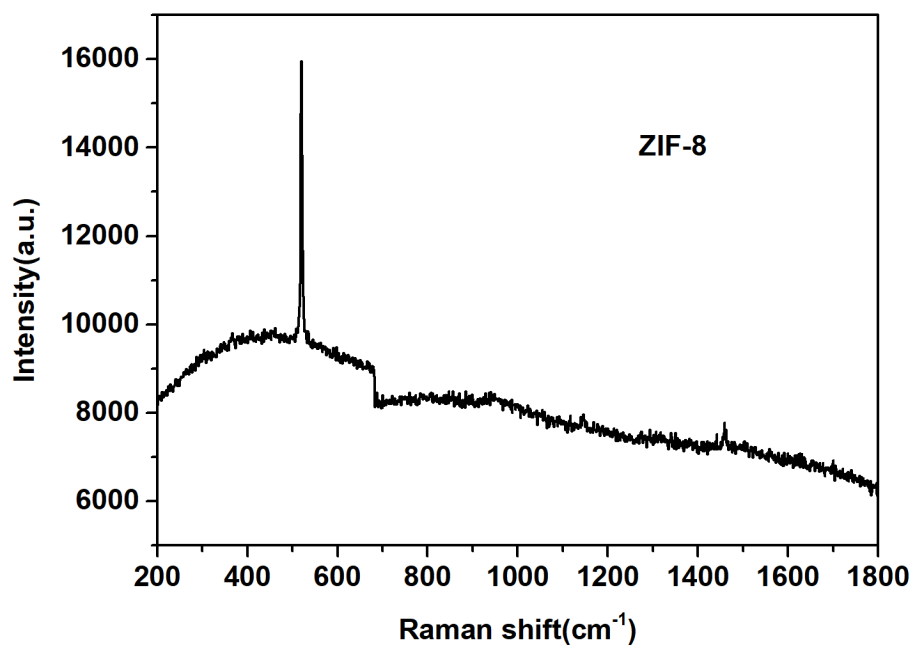

Fig. S16 Normal Raman spectrum of ZIF-8.

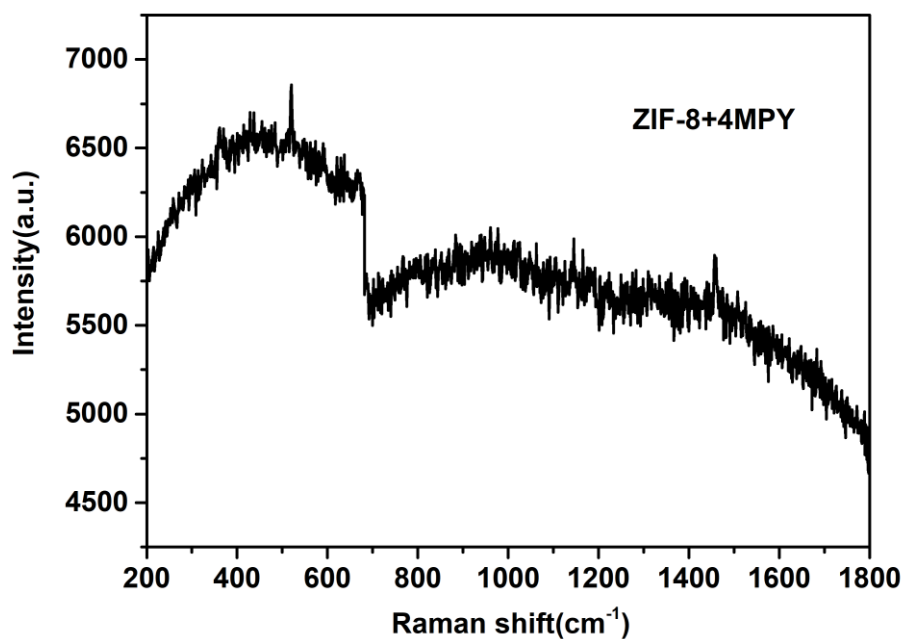

Fig. S17 SERS diagram of 4-MPY adsorbed on the ZIF-8 surface.

**Table S1.** Raman/SERS shifts ( $\text{cm}^{-1}$ ) and band assignments of 4-Mpy on the Ag and  $\text{CsPbBr}_3@ZIF-8$  substrates.

| 4MPY | Ag+4MPY | $\text{CsPbBr}_3@zif8+4MPY$ | assignments                        |
|------|---------|-----------------------------|------------------------------------|
| 428  | 426     | 430                         | 7a1 $\delta$ (C-S)/ $\gamma$ (CCC) |
| 720  | 711     | 713                         | 6a1 $\beta$ (C-C)/ $\nu$ (C-S)     |
| 988  | 1008    | 988                         | a1 ring breathing                  |
| 1043 | 1061    | 1051                        | 18a1 ring breathing $\beta$ (CH)   |
| 1106 | 1098    | 1106                        | 12a1 ring breathing / $\nu$ (C-S)  |
| 1198 | 1202    | 1197                        | 9a1 $\beta$ (CH)/ $\delta$ (NH)    |
| 1246 | 1221    | 1236                        | 9a1 $\beta$ (CH)                   |
| 1395 | 1390    | 1412                        | 14b2 $\nu$ (C=C)                   |
| 1476 | 1469    | 1479                        | 19a1 $\nu$ (C=C/C=N)               |
| 1604 | 1577    | 1573                        | 8b2 $\nu$ (C=C)                    |
| 1617 | 1609    | 1611                        | 8a1 $\nu$ (C=C)                    |

Assignments from Refs<sup>1, 2, 3</sup>

[1] F.R. Dollish, F.F. Bentley, W.G. Fateley, *microelectronics journal*, 1974, 37(5):395-403.

[2] J.H.S. Green, W. Kynaston, H.M. Paisley, *Spectrochimica Acta Part A: Molecular and Biomolecular Spectroscopy*, 1963, 19(2):549-564.

[3] T.H. Joo, M.S. Kim, K. Kim, *Journal of Molecular Structure*, 1987, 160(1-2):81-89.
